# Supplementary material for: Prognostic value of HPV-mRNA in sentinel lymph nodes of cervical cancer patients with pN0-status
Source: PubMed Central journal article supplement (PMC4673218; doi:10.18632/oncotarget.4132), 2015-05-14
Supplement: oncotarget-06-23015-s001.pdf [file oncotarget-06-23015-s001.pdf]

# Prognostic value of HPV-mRNA in sentinel lymph nodes of cervical cancer patients with pN0-status

## Supplementary Material

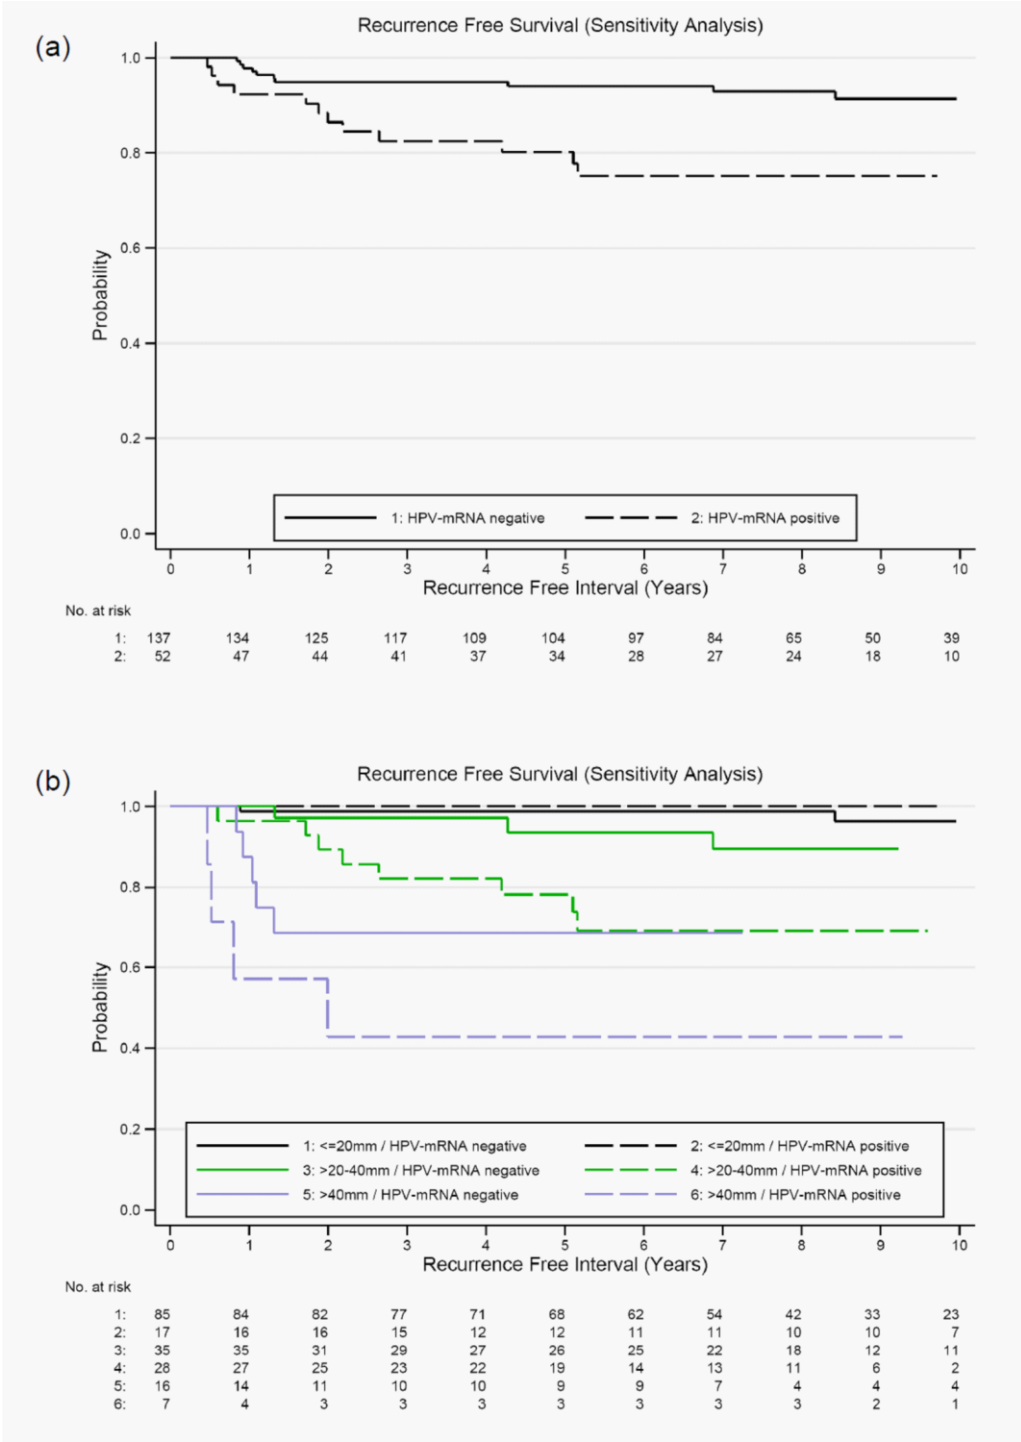

Figure S1: (a) Sensitivity analysis - Kaplan Meier curves of recurrence-free survival according to HPV-mRNA status of sentinel lymph nodes; log rank test  $p=0.002$  (study population  $n=189$ ) and (b) Sensitivity analysis - Kaplan Meier curves of recurrence-free survival according to HPV-mRNA status of sentinel lymph nodes stratified by tumor size; log rank test for HPV-mRNA adjusted for tumor size  $p=0.028$  (study population  $n=189$ ).

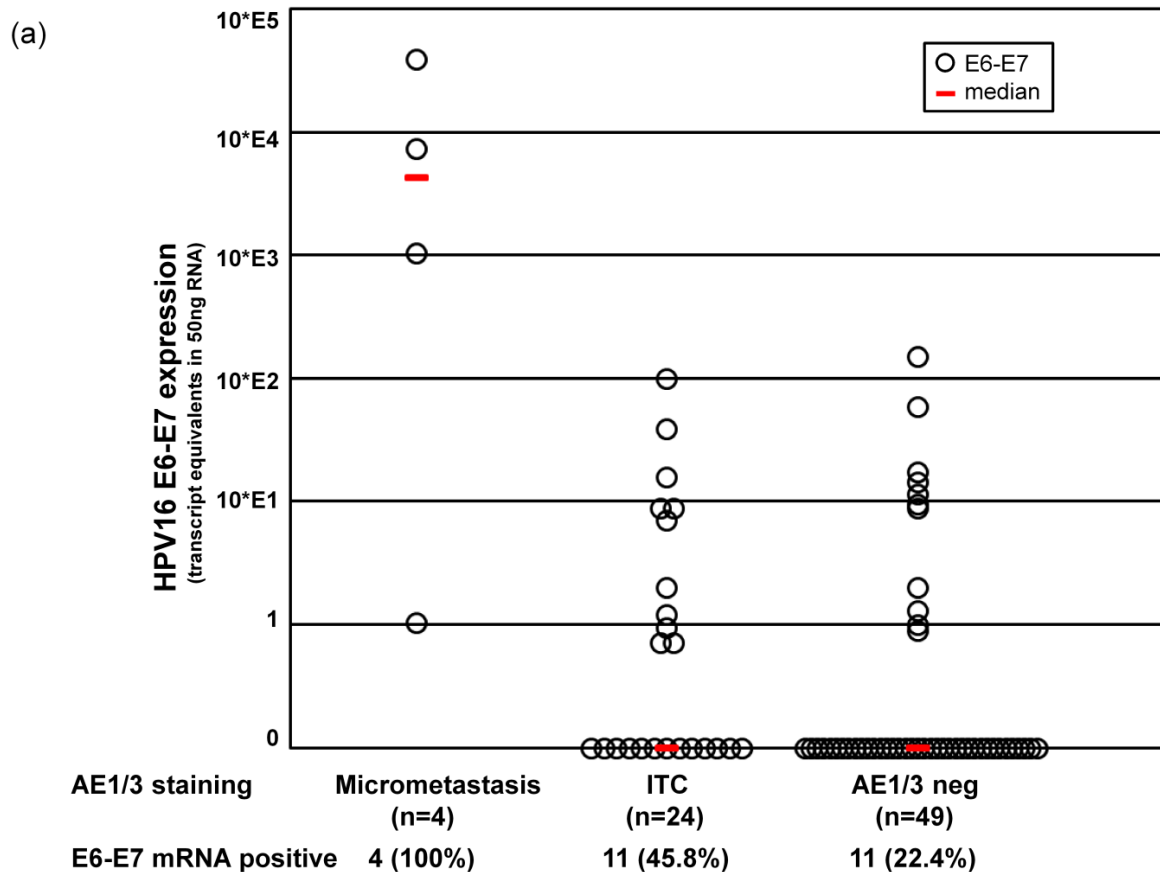

(b)

|      |   | nested PCR |    |    |
|------|---|------------|----|----|
|      |   | +          | -  |    |
| qPCR | + | 24         | 2  | 26 |
|      | - | 5          | 46 | 51 |
|      |   | 29         | 48 | 77 |

kappa = 0.802

Figure S2: HPV16 E6-E7-mRNA expression as determined by qRT-PCR and RT-nested-PCR in relation to immunohistochemical staining for cytokeratins (AE1/3) in 77 SLN scored negative by conventional histopathology. (a) Expression levels (qRT-PCR) corresponding to HPV16-E6-E7 transcripts in 50ng of total RNA (see Häfner et al. [16]) are shown on the y-axis. 50ng of total RNA corresponds to  $5 \times 10^3$  cells. On the x-axis the results of AE1/3 staining and quantitative RT-nested-PCR are shown. ITC refers to single dispersed tumor cells. (b) Overall agreement between qRT-PCR and RT-nested PCR.

Supplementary Table S1: Primers for the detection of hrHPV-E6-mRNA by RT-nested-PCR and oligonucleotide probes for Southern blots

| HPV type | 1st PCR                |                         |                       | 2nd PCR                |                         |                       | Southern Blot hybridisation probe |
|----------|------------------------|-------------------------|-----------------------|------------------------|-------------------------|-----------------------|-----------------------------------|
|          | forward                | reverse                 | length FLT (E6*) [bp] | forward                | reverse                 | length FLT (E6*) [bp] |                                   |
| 16       | ACAGGAGCCACCAAGAGTTACC | ATGGTTCTGAGAACAGATGGGGC | 739 (556)             | TGGGGCACACAATCTAGTGTGC | AGTTACCAGATTATGCACAGAGC | 704 (521)             | TCATGCAATGAGGTGTCTCC              |
| 18       | ACAAGCTACCTGATCTGTGC   | CTGAGTCGCTTAATTGCTCG    | 554 (373)             | GGAACTGAACACTCACTGTC   | TGACATAGAAGGTCAACCGG    | 512 (331)             | GCAGCATGCGGTATCTGCTC              |
| 31       | AATCTGCGAAGAACCTCGG    | GGCACACGATCCAAATGAGC    | 717 (514)             | CGGAAATGCATGAACTAAGC   | CCAAATGAGCCATTAAACAGC   | 688 (485)             | ACTCCGTGTGGTGTCTGTC               |
| 33       | TGCACTGATTTGTCCAAAG    | TTTGTACCTTCAGGATCG      | 759 (481)             | CCAAGCATTGAGACAAC      | GATCGGCCATTGTAGATG      | 733 (455)             | CACTAAITTTAGATAAGAACCGGAAA        |
| 35       | TCAGGACCCAGCTGAACGACC  | TATGCTCTCTGGAACAGCGG    | 746 (563)             | GAACGACCTTACAACTGCATG  | CACACTATTCCAAATGTGCC    | 704 (521)             | GGTCAGTTGCCTGGGTTC                |
| 39       | TCACAATCTGCAGAACGGC    | ACAATTTCTGCAAGGTGGG     | 509 (326)             | TGCCAGACTGTGCAACAGC    | AGGTGGGCTTTGGTCCACGC    | 467 (284)             | GGTCGTGCAATAGACACAGG              |
| 45       | ATGGCGCGCTTTCAGATCC    | CTGACTCGCTTAATTGCTCG    | 591 (406)             | GCAACGACCTTACAAGTAC    | CATTCTGAGGTTCCAAATGC    | 520 (335)             | TACCTCTGCGCTTCCAATGTT             |
| 51       | GGGAAAGCACCAACAGCTGC   | CTAGTTGTCGCAACACAGG     | 753 (528)             | GCTGCATGAATTAATGGAAGC  | CAAACGAGGTTAGTTCGCC     | 716 (491)             | GCGAAGGGTGTCTCACTGC               |
| 52       | CCAGCAACACGCCCGGACC    | AATGTGCCCAACAGCATTGTC   | 705 (450)             | CCCTGCACGAATTGTGTGAGG  | TAGAGTACGAAGTCCGTCGC    | 660 (405)             | TGTCTCCAGCATGACGTTACA             |
| 53       | CATCCATGGATCGCAATTGTTG | TTGCAGTTATCGCTTGTGTC    | 790 (607)             | AAGAGCCACCGATACATTGC   | CACCTGTGCCATAAGCATTG    | 715 (532)             | GAGGACTGCCGATCACTGAAC             |
| 56       | CAACAATCCACAGGAACCTCC  | GCTTGTGTGGCCGCTCTGC     | 605 (350)             | GCCTGACCACTGAGTGTGAGG  | TCCTCATCTCTGAGTGTCC     | 541 (286)             | GTTTGTCTCCAGCACCCAAAC             |
| 58       | ATTTGTGTGAGGCTTTGG     | CCGTTGTACCTTCAGGG       | 759 (481)             | CGTTGGAGACATCTGTGC     | CAGGGTCACTCATGTCAG      | 734 (456)             | ACTCACTATTTTATAGATGCAATCGTAAG     |
| 59       | TGAGGATCCACACAACGACC   | AAACAGCTGCTGAAGGCTCG    | 752 (353)             | ACAACGACCTACAACTGCC    | CTCGCAATCCGCTTGCAGC     | 727 (328)             | TCTTTCTTGAGTCCCTT                 |
| 66       | CATATTCAGCAATCAACAGG   | TCAATTCCTGTTGGCGTGC     | 527 (272)             | ACGTCCAGCAAGCTGCACC    | TGCAACGTGGTACTTTACC     | 467 (212)             | TCCAACTGCAAAACGACCC               |
| 68       | AGTTGTCTATACCAATGGCG   | GGTTCCGTTGCACACCAAGG    | 825 (642)             | CGCTATTCACAACCTGAGT    | AGCAGTTTACGTTCCGACGG    | 764 (581)             | GACGCTGTTGTGCTCCGCTC              |
| 73       | GACTGTGTGTTTGGCAAGC    | AGGTCAATTCGGTGTGTC      | 429 (246)             | TGATTTTGATTTAGTATTGTT  | CACCACAGTTGCAGATGTC     | 313 (130)             | GCCTATACTGATTTGCTATATGCTC         |
| 82       | CATAAGAGAAAGCACGAAACG  | GGTGTAACTCCAACTATGTC    | 502 (277)             | TGTGAAGCCTGCAATATGTC   | TACCACGATGGCGTTATTA     | 428 (203)             | TTCTTAGGCCCAAGTGGTCTC             |

The RT-nested-PCR assay for hrHPV-E6-mRNA allows the detection of solely matured spliced (E6\*) and un-spliced (E6-full length) viral oncogene transcripts which can only be found in intact tumor cells

Supplementary Table S2: Frequency of adjuvant therapy, para-aortic lymph node dissection and death in relation to HPV mRNA status

|                                          | HPV mRNA status of sentinel lymph nodes |                     |                   |                     |
|------------------------------------------|-----------------------------------------|---------------------|-------------------|---------------------|
|                                          | Positive                                | Negative            | Probably negative | Total               |
| <b>Adjuvant therapy post OP</b>          | 19 / 52<br>(36.5%)                      | 26 / 119<br>(21.8%) | 7 / 17<br>(41.2%) | 52 / 188<br>(27.7%) |
| <b>Para-aortic lymph node dissection</b> | 16 / 52<br>(30.8%)                      | 28 / 119<br>(23.5%) | 7 / 18<br>(38.9)  | 51 / 189<br>(27.0%) |
| <b>Death* (due to cervical cancer)</b>   | 7 (6) / 52                              | 6 (2) / 119         | 2 (1) / 18        | 15 (9) / 189        |

\* without percentage due to different duration of observation

Supplementary Table S3: Five-years rate of recurrence free survival according to HPV mRNA status of sentinel lymph nodes stratified by tumor size (sensitivity analysis population, n=189)

| Tumor size [mm] | HPV mRNA of SLN | Disease recurrence (n) | 5-years rate of recurrence free survival (95% CI) |
|-----------------|-----------------|------------------------|---------------------------------------------------|
|                 | all             | 22 (189)               | 90.1 (84.8 – 93.7) %                              |
| **              | all             |                        |                                                   |
|                 | negative*       | 10 (137)               | 94.0 (88.4 – 97.0) %                              |
|                 | positive        | 12 ( 52)               | 80.2 (66.2 – 88.8) %                              |
| ***             | ≤ 20            |                        |                                                   |
|                 | negative*       | 2 ( 85)                | 98.8 (91.9 – 99.8) %                              |
|                 | positive        | 0 ( 17)                | 100.0 %                                           |
|                 | >20 to 40       |                        |                                                   |
|                 | negative*       | 3 ( 35)                | 93.5 (76.3 – 98.4) %                              |
|                 | positive        | 8 ( 28)                | 78.2 (57.8 – 89.6) %                              |
|                 | >40             |                        |                                                   |
|                 | negative*       | 5 ( 16)                | 68.8 (40.5 – 85.6) %                              |
|                 | positive        | 4 ( 7)                 | 42.9 ( 9.8 – 73.4) %                              |

Abbreviations: SLN – sentinel lymph node, CI – confidence interval

\* Probably or definitely negative

\*\* Log rank test for HPV mRNA: p=0.002

\*\*\* Log rank test for HPV mRNA adjusted for tumor size: p=0.028

Supplementary Table S4: Strength of association between prognostic factors and recurrence free survival determined by Cox regression analysis (sensitivity analysis population, n=189)

|                             |                                 | n   | Hazard Ratio (95% CI) | p-value*** |
|-----------------------------|---------------------------------|-----|-----------------------|------------|
| <i>Single factor models</i> |                                 |     |                       |            |
| HPV mRNA of SLN             | probably or definitely negative | 137 | 1                     | 0.004      |
|                             | positive                        | 52  | 3.45 (1.48 – 7.98)    |            |
| Tumor size [mm]**           | ≤ 20                            | 102 | 1                     | <0.001     |
|                             | >20 to 40                       | 63  | 9.43 (2.08 – 42.54)   |            |
|                             | >40                             | 23  | 27.01 (5.82 – 125.19) |            |
| Histology                   | Squamous cell ca.               | 152 | 1                     | 0.487      |
|                             | Adenocarcinoma                  | 29  | 1.28 (0.42 – 3.82)    |            |
|                             | Others                          | 8   | 2.41 (0.55 – 10.47)   |            |
| Grading**                   | G1                              | 16  | 1                     | 0.194      |
|                             | G2                              | 85  | 0.38 (0.09 – 1.52)    |            |
|                             | G3                              | 82  | 0.88 (0.25 – 3.08)    |            |
| Age [years]                 |                                 | 189 | 1.03 (0.99 – 1.06)    | 0.074      |
| <i>Two factor models</i>    |                                 |     |                       |            |
| HPV-mRNA of SLN**           | negative*                       | 136 | 1                     | 0.034      |
|                             | positive                        | 52  | 2.54 (1.07 – 6.03)    |            |
| Tumor size**                | ≤ 20 mm                         | 102 | 1                     | <0.001     |
|                             | >20 – 40 mm                     | 63  | 7.09 (1.53 – 32.87)   |            |
|                             | >40 mm                          | 23  | 24.42 (5.24 – 113.60) |            |
| HPV-mRNA of SLN             | negative*                       | 137 | 1                     | 0.006      |
|                             | positive                        | 52  | 3.32 (1.41 – 7.75)    |            |
| Histology                   | Squamous cell ca.               | 152 | 1                     | 0.747      |
|                             | Adenocarcinoma                  | 29  | 1.24 (0.41 – 3.71)    |            |
|                             | Others                          | 8   | 1.72 (0.38 – 7.59)    |            |
| HPV-mRNA of SLN**           | negative*                       | 131 | 1                     | 0.010      |
|                             | positive                        | 52  | 3.05 (1.31 – 7.10)    |            |
| Grading**                   | G1                              | 16  | 1                     | 0.291      |
|                             | G2                              | 85  | 0.43 (0.10 – 1.74)    |            |
|                             | G3                              | 82  | 0.90 (0.25 – 3.16)    |            |
| HPV mRNA of SLN             | negative*                       | 137 | 1                     | 0.005      |
|                             | positive                        | 52  | 3.30 (1.42 – 7.64)    |            |
| Age [years]                 |                                 | 189 | 1.03 (0.99 – 1.06)    | 0.106      |

Abbreviations: SLN – sentinel lymph node, CI – confidence interval, ca. – cancer

\* Probably or definitely negative

\*\* Valid datasets: Tumor size and related two factor model n=188, grading and related two factor model

n=183

\*\*\* Wald test
